# Supplementary material for: Circulating extracellular vesicles regulate ELAVL1 by delivering miR-133a-3p which affecting NLRP3 mRNA stability inhibiting PANoptosome formation
Source: Research Square preprint supplement (doi:10.21203/rs.3.rs-4975982/v1), 2024-09-25
Supplement: Supplementary file 1 [file 9756b5728d8801089c74b7bc.docx]

**Table S2. Primer sequence**

| **Gene** | **Primer Sequence** |
| --- | --- |
| VEGFA forward | 5’- TTGCCTTGCTGCTCTACCTCCA -3’ |
| VEGFA reverse | 5’- GATGGCAGTAGCTGCGCTGATA -3’ |
| CD34 forward | 5’-ATTTTTCCCTCGACACCCGAT-3’ |
| CD34 reverse | 5’-TCCCAGGCGTAGACCAAGA-3’ |
| COX2 forward | 5’- GGGTGTCCCTTCGCCTCTTT -3’ |
| COX2 reverse | 5’- GTTGCCGGTATCTGCCTTCA-3’ |
| NLRP3 forward | 5’- GCCGAGTTTGCCTTGCTCA-3’ |
| NLRP3 reverse | 5’- TCCGGAGGCTCACCAGTTTC-3’ |
| ASC forward | 5’-GGCCAATAAGATGGGTCTGA-3’ |
| ASC reverse | 5’-GCTGCACACAGTCCAGAAAA-3’ |
| Caspase1 forward | 5’-TGTGGAACATGGAGGGAAG-3’ |
| Caspase1 reverse | 5’-TGTGCCTGTGCTGGAACTTTC-3’ |
| GSDMD forward | 5’-TTGGTCAAGATCATCCGGC-3’ |
| GSDMD reverse | 5’-GCTCACCATGCTGTGCTGG-3’ |
| ELAVL1 forward | 5’- ACTGCAGGGATGACATTGGG-3’ |
| ELAVL1 reverse | 5’- CCAAGCTGTGTCCTGCTACT-3’ |
| miR-133a-3p forward | 5’- ACACTCCAGCTGGGTTTGTCCCCTTCAAC-3’ |
| miR-133a-3p reverse | 5’- TGGTGTCGTGGAGTCG-3’ |
| U6 forward | 5’- CTCGCTTCGGCAGCACA-3’ |
| U6 reverse | 5’- AACGCTTCACGAATTTGCGT-3’ |
| GAPDH forward | 5’-AGCCCAAGATGCCCTTCAGT-3’ |
| GAPDH reverse | 5’-AGCCCAAGATGCCCTTCAGT-3’ |
