# Supplementary material for: Circulating extracellular vesicles regulate ELAVL1 by delivering miR-133a-3p which affecting NLRP3 mRNA stability inhibiting PANoptosome formation
Source: Research Square preprint supplement (doi:10.21203/rs.3.rs-4975982/v1), 2024-09-25
Supplement: Supplementary file 2 [file df5a1526a2c857d12b4c8914.docx]

**Supplementary Table 1 Patient and Healthy donor characteristics**

| category | Patients | Control | P value |
| --- | --- | --- | --- |
| Age(yr) | 45.23±6.45 | 51.19±7.83 | >0.05 |
| Sex | 2/2 | 2/2 | >0.05 |
| Weight(kg) | 75.35±15.24 | 76.18±16.33 | >0.05 |
